# Supplementary material
Source: PubMed Central journal article supplement (PMC4715224)
Supplement: mmc2.pdf [file mmc2.pdf]

99 Kb

153 Kb
