# Supplementary material
Source: PubMed Central journal article supplement (PMC4715224)

chr11:5,220,623 | chr11:5,233,234

A

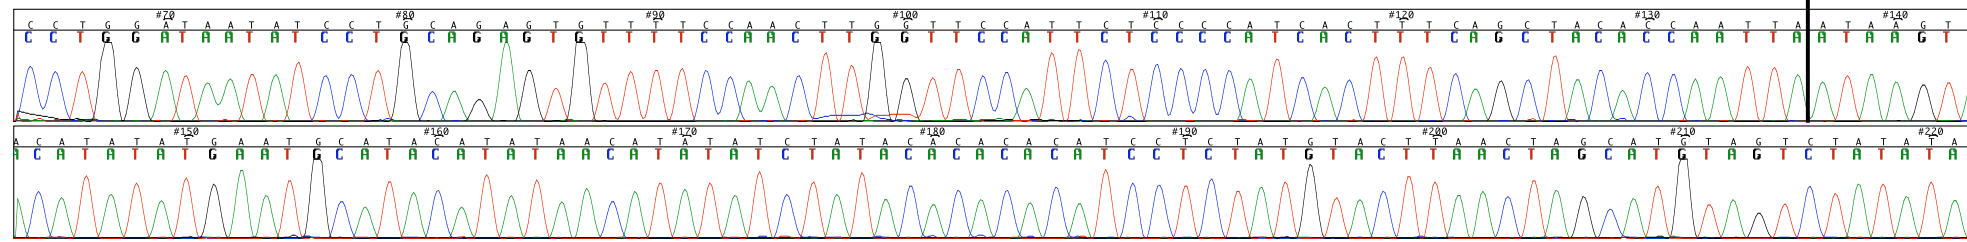

chr11:5,201,647 | chr11:5,229,059

B

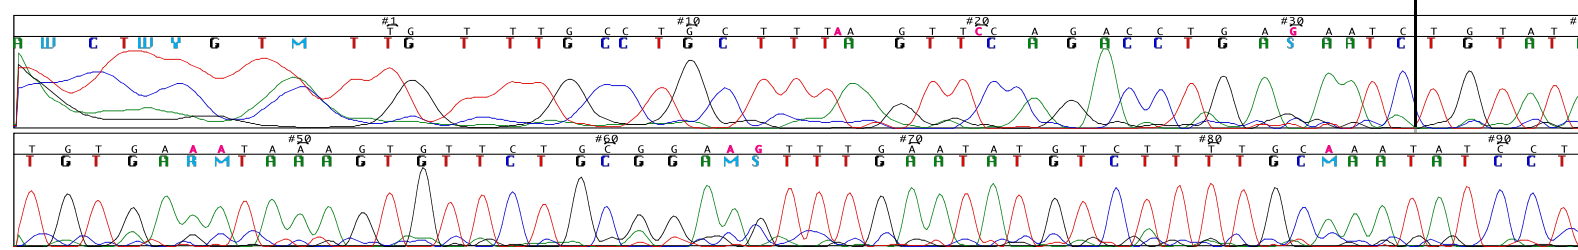

chr11:5,223,960 | chr11:5,231,570

C

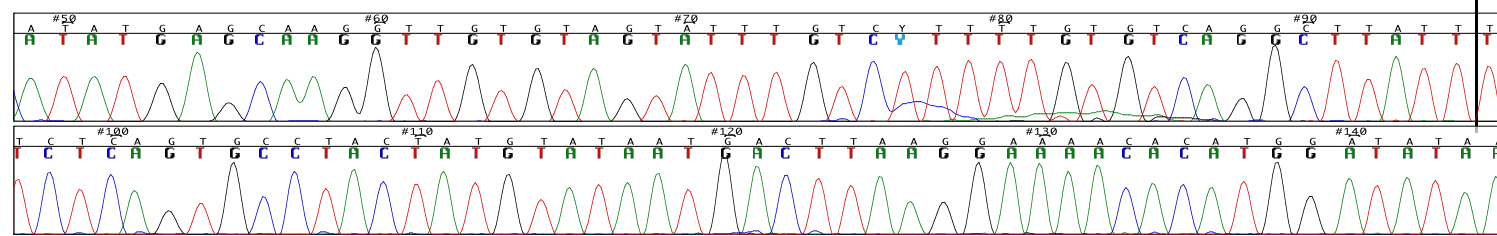

chr11:5,238,759

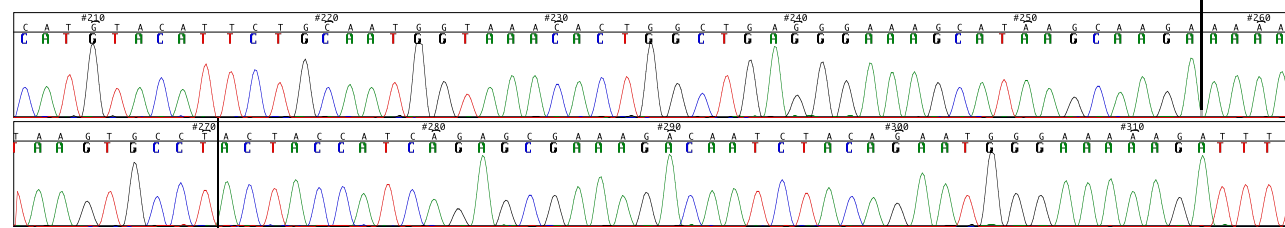

chr11:5,246,317

chr11:5,225,894 | chr11:5,227,412

D

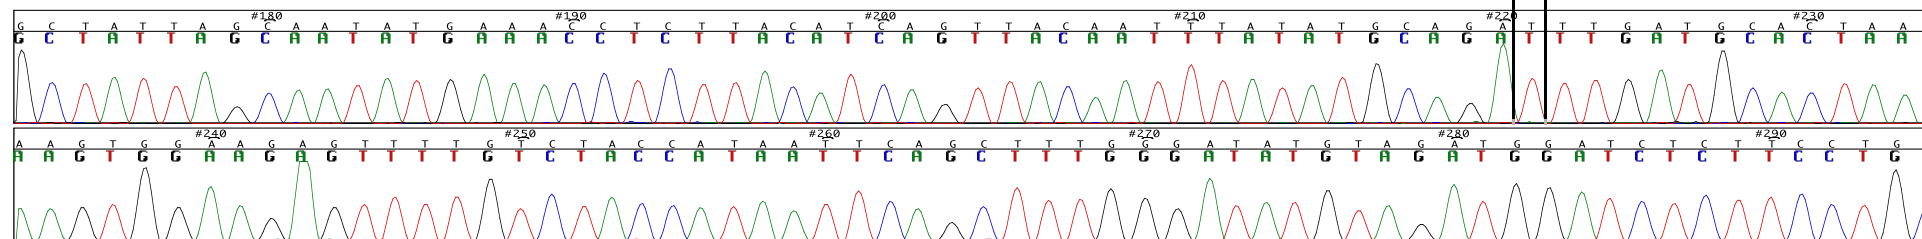

chr11:5,238,245 | chr11:5,298,127

E

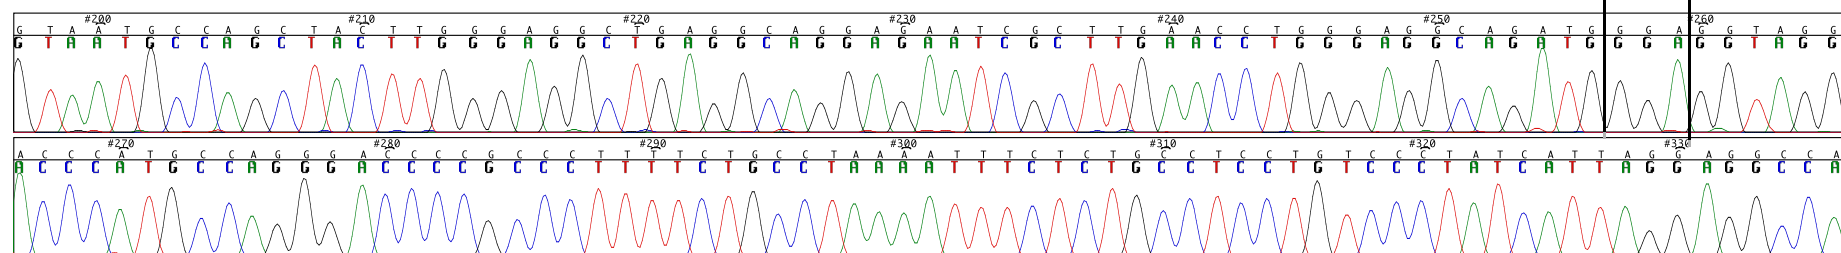

Supplement: mmc1.pdf [file mmc1.pdf]
